# Supplementary material
Source: HighWire-hosted journal article supplement (https://jnnp.bmj.com/highwire/filestream/185069/field_highwire_adjunct_files/2/7991040webonlytable3.xls)
Supplement: 7991040webonlytable3.xls [file 7991040webonlytable3.xls]

## Sheet: SupTab3
Supplemental Table 3. Incidence number assessed by response rate of each category.
	Male			Female			Total
Stratum ID	n	Incidence number*		n	Incidence number*		n	Incidence number*
1	3	6.97059		2	4.64706		5	11.6176
2	9	19.1962		5	10.6646		14	29.8608
3	4	7.59091		5	9.48864		9	17.0795
4	26	47.4783		13	23.7391		39	71.2174
5	23	35.2877		17	26.0822		40	61.3699
6	41	70.9785		31	53.6667		72	124.645
7	0	0		0	0		0	0
8	0	0		1	2.88235		1	2.88235
9	4	8.625		5	10.7812		9	19.4062
10	1	2.02381		4	8.09524		5	10.119
11	1	2.22857		1	2.22857		2	4.45714
12	8	22.2222		5	13.8889		13	36.1111
13	0	0		0	0		0	0
14	0	0		0	0		0	0
15	0	0		1	1.625		1	1.625
16	0	0		0	0		0	0
17	0	0		1	1.35088		1	1.35088
18	2	2.71605		3	4.07407		5	6.79012
19**	NA	NA		NA	NA		NA	NA
20	4	8		0	0		4	8
21	1	6		1	6		2	12
22	1	1.75		0	0		1	1.75
23	4	6		10	15		14	21
24	79	106.086		39	52.3714		118	158.457
25***	NA	NA		NA	NA		NA	NA
26	0	0		0	0		0	0
27	0	0		0	0		0	0
28	0	0		0	0		0	0
29	0	0		0	0		0	0
30	1	1.33333		0	0		1	1.33333
	212	354.487		144	246.586		356	601.073
NA: not available
*Incidence number assessed by response rate of each stratum.
**Stratum 19 has only one medical facility with a response rate of 0%; Incidence number of the stratum could not be determined.
*** Stratum 25 has no proper medical facility; Incidence number of the stratum could not be determined.
